# Supplementary material for: Evaluation of the Immunity Responses in Mice to Recombinant Bacillus subtilis Displaying Newcastle Disease Virus HN Protein Truncations
Source: MDPI journal article supplement (doi:10.3390/microorganisms12030439), 2024-02-21
Supplement: s1 [file s1]

Supplementary materials for

## Evaluation of Immune Responses in mice to Recombinant *Bacillus subtilis* Displaying Newcastle Disease Virus *HN* Protein Truncations

Jianzhen Li <sup>1,2,†</sup>, Miao Yang <sup>3,†</sup>, Bin Chen <sup>1</sup>, Zhenhua Wang <sup>2</sup>, Yuheng Cao <sup>1</sup>, Yang Yang <sup>1</sup>, Mengwei Zhang <sup>1</sup>, Dongmei Zhang <sup>1</sup>, Xueqin Ni <sup>1</sup>, Yan Zeng <sup>1,\*</sup> and Kangcheng Pan <sup>1,\*</sup>

The file includes:

**Table S1.** List of strains, vaccines, cell lines, plasmids, and primer sequences.

**Table S2.** Sequences of primers used for real-time quantitative PCR.

**Table S3.** *HNJD* gene sequences and sites of optimization.

**Table S1.** List of strains, vaccines, cell lines, plasmids, and primer sequences.

| Strains, Vaccines, Cell lines, Plasmids, and Primer Sequences | Description                                                 | Source or Restriction Site |
|---------------------------------------------------------------|-------------------------------------------------------------|----------------------------|
| <b>Strains</b>                                                |                                                             |                            |
| <i>Escherichia coli</i> ( <i>E.coli</i> )                     | Competent cell strains                                      | TIANGEN, Beijing, China    |
| DH5α and BL21                                                 |                                                             |                            |
| <i>B. subtilis</i> 168                                        | Genbank accession: AL009126.3                               | Our lab                    |
| <i>B. subtilis</i> RH                                         | <i>B. subtilis</i> 168 <i>amyE::cotB-HNJD</i>               | This work                  |
| <b>Vaccines</b>                                               |                                                             |                            |
| Newcastle disease vaccine                                     | Live (Strain LaSota)                                        | HARVAC, Harbin, China      |
|                                                               | Live (Strain CS2)                                           | EBVAC, Hangzhou, China     |
|                                                               | Inactivated (Strain La Sota)                                | Yebio, Qingdao, China      |
| <b>Cell lines</b>                                             |                                                             |                            |
| Chicken embryo fibroblast (CEF)                               | UMNSAH/DF-1                                                 | SUNNCELL, Wuhan, China     |
| <b>Plasmids</b>                                               |                                                             |                            |
| pUCm-T                                                        | T-A cloning vector                                          | Sangon, Shanghai, China    |
| pET-32a- <i>HNJD</i>                                          | Prokaryotic expression vector                               | This work                  |
| pDG364                                                        | <i>E. coli-B. subtilis</i> shuttle vector                   | Our lab                    |
| pDG364- <i>cotB</i>                                           | pDG364 derivative carrying <i>cotB</i> gene                 | Our previous work          |
| pDG364- <i>cotB-HNJD</i>                                      | pDG364 derivative carrying the fusion <i>cotB-HNJD</i> gene | This work                  |
| <b>Primer Sequences</b>                                       |                                                             |                            |
| <i>HNJD</i> -F1                                               | 5'-CGCGGATCCATGGTGATATACAAGCGATACAATGAC-3'                  | <i>BamH</i> I              |
| <i>HNJD</i> -R1                                               | 5'-CCGGAATTCTTAAGCAATGCTGAGACAATAGGT-3'                     | <i>EcoR</i> I              |
| <i>HNJD</i> -F2                                               | 5'-CCCAAGCTTATGGTGATATACAAGCGATACAATGAC-3'                  | <i>Hind</i> III            |
| <i>HNJD</i> -R2                                               | 5'-CCGGAATTCTTAAGCAATGCTGAGACAATAGGT-3'                     | <i>EcoR</i> I              |
| <i>cotB</i> -F                                                | 5'-CGGGATCCACGGATTAGGCCGTTTGTCC-3'                          | <i>BamH</i> I              |
| <i>cotB</i> -R                                                | 5'-GGGAAGCTTGGATGATTGATCATCTGAAG-3'                         | <i>Hind</i> III            |
| <i>amyE</i> -F                                                | 5'-CCAATGAGGTTAAGAGTATTCC-3'                                | Null                       |
| <i>amyE</i> -R                                                | 5'-CGAGAAGCTATCACCGCCAGC-3'                                 | Null                       |

**Table S2.** Sequences of primers used for real-time quantitative PCR.

| Gene           | Primer Sequences (5'-3')    |                          | Accession Number |
|----------------|-----------------------------|--------------------------|------------------|
| $\beta$ -actin | F: GCTCTTTTCCAGCCTTCCTT     | R: GATGTCAACGTCACACTT    | NM_007393.5      |
| IL-1 $\beta$   | F: ATGAAAGACGGCACCAC        | R: GCTTGCTCTGCTTGAG      | NM_008361.3      |
| IL-6           | F: TGCAAGAGACTTCCATCCAGT    | R: GTGAAGTAGGGAAGGCCG    | NM_031168.1      |
| IL-10          | F: GGTTGCCAAGCCTTATCGGA     | R: ACCTGCTCCACTGCCTTGCT  | NM_010548.2      |
| IFN- $\gamma$  | F: TCAAGTGGCATAGATGTGGAAGAA | R: TGGCTCTGCAGGATTTTCATG | NM_008337.4      |
| TNF- $\alpha$  | F: ACGGCATGGATCTCAAAGAC     | R: AGATAGCAAATCGGCTGACG  | NM_001278601.1   |

**Table S3.** *HNJD* gene sequences and sites of optimization.

| Original <i>HNJD</i>                                                                                                                                                                                                                                                                                                                                                                                                                                                                                                                                                                                                                                                                                                                            | Optimized <i>HNJD</i>                                                                                                                                                                                                                                                                                                                                                                                                                                                                                                                                                                                                                                                                                                                          |
|-------------------------------------------------------------------------------------------------------------------------------------------------------------------------------------------------------------------------------------------------------------------------------------------------------------------------------------------------------------------------------------------------------------------------------------------------------------------------------------------------------------------------------------------------------------------------------------------------------------------------------------------------------------------------------------------------------------------------------------------------|------------------------------------------------------------------------------------------------------------------------------------------------------------------------------------------------------------------------------------------------------------------------------------------------------------------------------------------------------------------------------------------------------------------------------------------------------------------------------------------------------------------------------------------------------------------------------------------------------------------------------------------------------------------------------------------------------------------------------------------------|
| *ATG GTGATATACAAGCGATACAATGACACATG<br>CCCAGATGAGCAAGACTACCAGATTCGAATGG<br>CCAAGTCTTCGTATAAGCCTGGACGGTTTGGT<br>GGGAAACGCATACAGCAGGCTATCTTATCTATC<br>AAGGTGTCAACATCCTTAGGCGAAGACCCGGT<br>ACTGACTGTACCGCCCAACACAGTCACACTCA<br>TGGGGGCCGAAGGCA GAATTCACAGTAGG<br>GACATCTCATTTCTTGTATCAACGAGGGTCATC<br>ATACTTCTCTCCCGCGTTATTATATCCTATGACA<br>GTCAGCAACAAAACAGCCACTCTTCATAGTCC<br>TTATACATTCAATGCCTTCACTCGGCCAGGTAG<br>TATCCCTTGCCAGGCTTCAGCAAGATGCCCCA<br>ACTCGTGTGTTACTGGAGTCTATACAGATCCAT<br>ATCCCCTAATCTTCTATAGAAACCACACCTTGC<br>GAGGGGTATTTCGGGACAATGCTTGATGGTGTA<br>CAAGCAAGACTTAACCTGCGTCTGCAGTATT<br>CGATAGCACATCCCGCAGTCGCATTACACGAG<br>TGAGTTCAAGCAGTACCAAAGCAGCATACACA<br>ACATCAACTTGTTTTAAAGTGGTCAAGACTAA<br>TAAGACCTATTGTCTCAGCATTGCTTAA | ATG GTGATATACAAGCGATACAATGACACATG<br>CCCAGATGAGCAAGACTACCAGATTCGAATGG<br>CCAAGTCTTCGTATAAGCCTGGACGGTTTGGT<br>GGGAAACGCATACAGCAGGCTATCTTATCTATC<br>AAGGTGTCAACATCCTTAGGCGAAGACCCGGT<br>ACTGACTGTACCGCCCAACACAGTCACACTCA<br>TGGGGGCCGAAGGCA GGATTCACAGTAGG<br>GACATCTCATTTCTTGTATCAACGAGGGTCATC<br>ATACTTCTCTCCCGCGTTATTATATCCTATGACA<br>GTCAGCAACAAAACAGCCACTCTTCATAGTCC<br>TTATACATTCAATGCCTTCACTCGGCCAGGTAG<br>TATCCCTTGCCAGGCTTCAGCAAGATGCCCCA<br>ACTCGTGTGTTACTGGAGTCTATACAGATCCAT<br>ATCCCCTAATCTTCTATAGAAACCACACCTTGC<br>GAGGGGTATTTCGGGACAATGCTTGATGGTGTA<br>CAAGCAAGACTTAACCTGCGTCTGCAGTATT<br>CGATAGCACATCCCGCAGTCGCATTACACGAG<br>TGAGTTCAAGCAGTACCAAAGCAGCATACACA<br>ACATCAACTTGTTTTAAAGTGGTCAAGACTAA<br>TAAGACCTATTGTCTCAGCATTGCTTAA |

\*The yellow-highlighted sequences indicate the optimized sites, while the red-highlighted sequences denote the start codons.
